# Supplementary material for: Front-end Weber-Fechner gain control enhances the fidelity of combinatorial odor coding
Source: eLife journal article supplement (doi:10.7554/elife.45293), 2019-06-28
Supplement: supp [file elife-45293-supp-v1.zip]

Archive with 11 entries (11 files):
- elife_poa_e45293_Figure_3_figure_supplement_3.pdf
- elife_poa_e45293_Figure_3_figure_supplement_4.pdf
- elife_poa_e45293_Figure_2_figure_supplement_2.pdf
- elife_poa_e45293_Figure_3_figure_supplement_1.pdf
- elife_poa_e45293_Figure_3_figure_supplement_2.pdf
- elife_poa_e45293_Transparent_Reporting_File.pdf
- elife_poa_e45293_Figure_3_figure_supplement_6.pdf
- elife_poa_e45293_Figure_3_figure_supplement_5.pdf
- elife_poa_e45293_Figure_4_figure_supplement_1.pdf
- elife_poa_e45293_Figure_2_figure_supplement_1.pdf
- elife_poa_e45293_Figure_5_figure_supplement_1.pdf
