# Supplementary figures and images for: Front-end Weber-Fechner gain control enhances the fidelity of combinatorial odor coding
Source: eLife journal article supplement (doi:10.7554/elife.45293), 2019-06-28

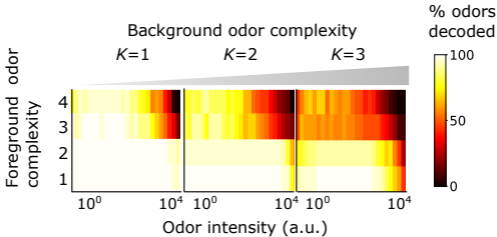

Supplement: supp [file elife-45293-supp-v1.zip › elife_poa_e45293_Figure_3_figure_supplement_3.pdf]

$$s_0 = 1 \text{ (a.u.)}$$
$$s_0 = 10^2 \text{ (a.u.)}$$
$$s_0 = 10^4 \text{ (a.u.)}$$
$$s_0 = 10^6 \text{ (a.u.)}$$
 $k = 2$ 
$$k = 4$$
 $k = 6$ 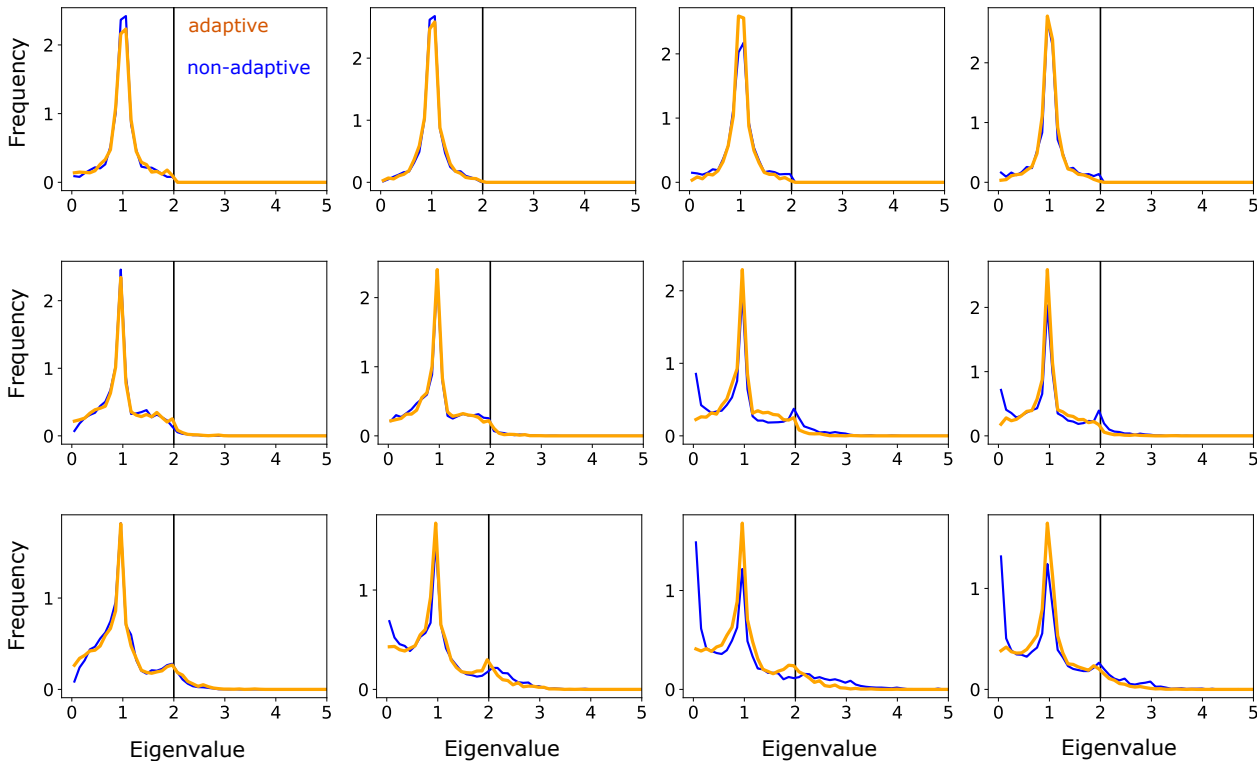

Supplement: supp [file elife-45293-supp-v1.zip › elife_poa_e45293_Figure_3_figure_supplement_4.pdf]

**A**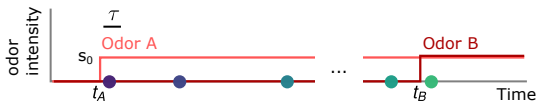**B**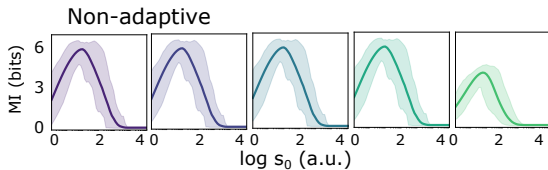**C**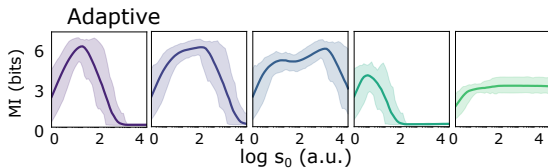

Supplement: supp [file elife-45293-supp-v1.zip › elife_poa_e45293_Figure_2_figure_supplement_2.pdf]

**A**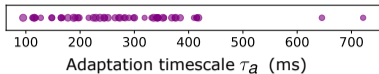**B**

Adaptive ( $\tau_A = 250$  ms)

$\tau_M = 25, 250, 1200$  ms

Non-adaptive

$\tau_M = 25, 250, 1200$  ms

Fluctuating odor complexity

$K = 1$

$K = 3$

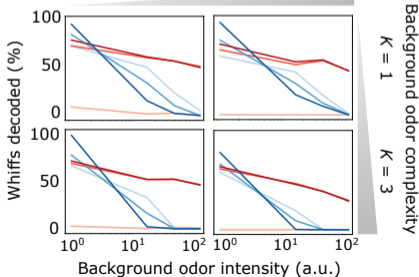

Supplement: supp [file elife-45293-supp-v1.zip › elife_poa_e45293_Figure_3_figure_supplement_1.pdf]

**A**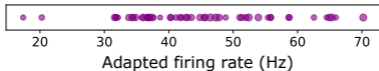**B**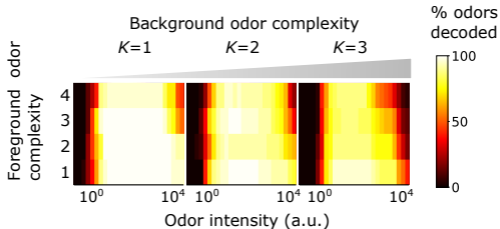

Supplement: supp [file elife-45293-supp-v1.zip › elife_poa_e45293_Figure_3_figure_supplement_2.pdf]

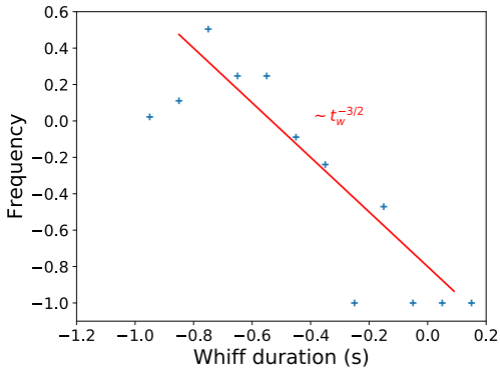

Supplement: supp [file elife-45293-supp-v1.zip › elife_poa_e45293_Figure_3_figure_supplement_6.pdf]

Non-adaptive

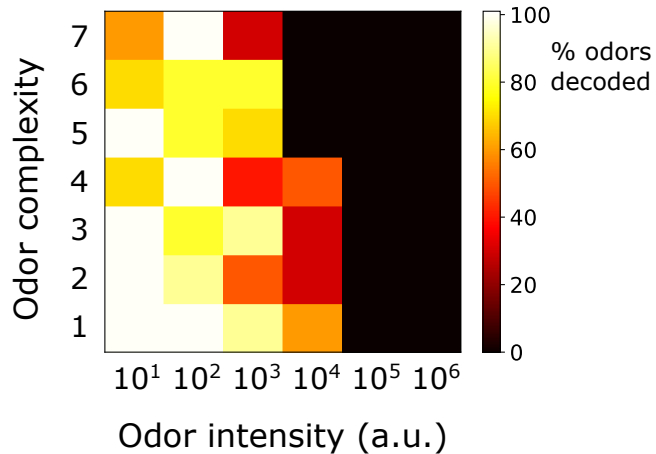

Adaptive

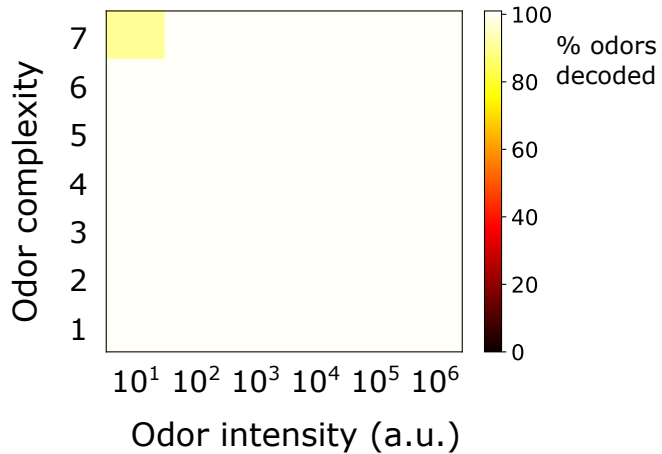

Supplement: supp [file elife-45293-supp-v1.zip › elife_poa_e45293_Figure_3_figure_supplement_5.pdf]

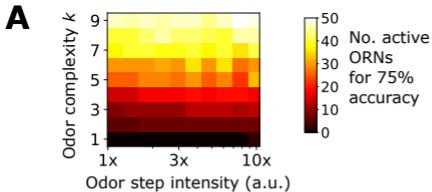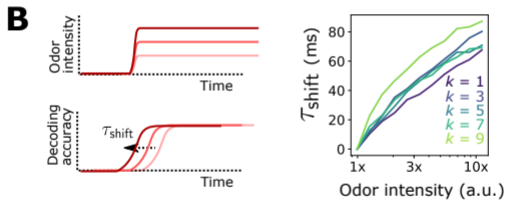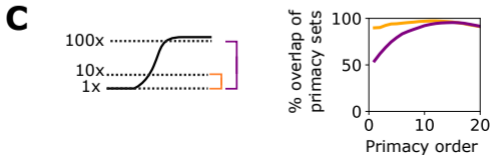

Supplement: supp [file elife-45293-supp-v1.zip › elife_poa_e45293_Figure_4_figure_supplement_1.pdf]

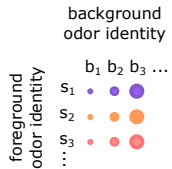

$$A_{a0} \sim \mathcal{N}(0.1, 0.03)$$

Non-adaptive

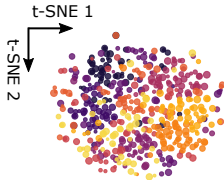

Adaptive

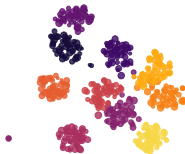

Supplement: supp [file elife-45293-supp-v1.zip › elife_poa_e45293_Figure_2_figure_supplement_1.pdf]

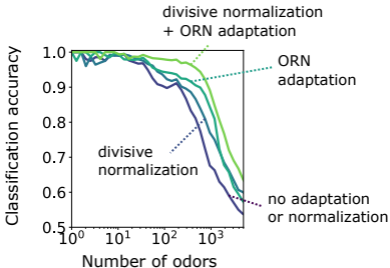

Supplement: supp [file elife-45293-supp-v1.zip › elife_poa_e45293_Figure_5_figure_supplement_1.pdf]
